# Supplementary figures and images for: Real-time Study of E-Cadherin and Membrane Dynamics in Living Animals: Implications for Disease Modeling and Drug Development
Source: Oxford University Press journal article supplement (doi:10.1158/0008-5472.can-08-4308), 2009-03-24

Supplementary Figure 1

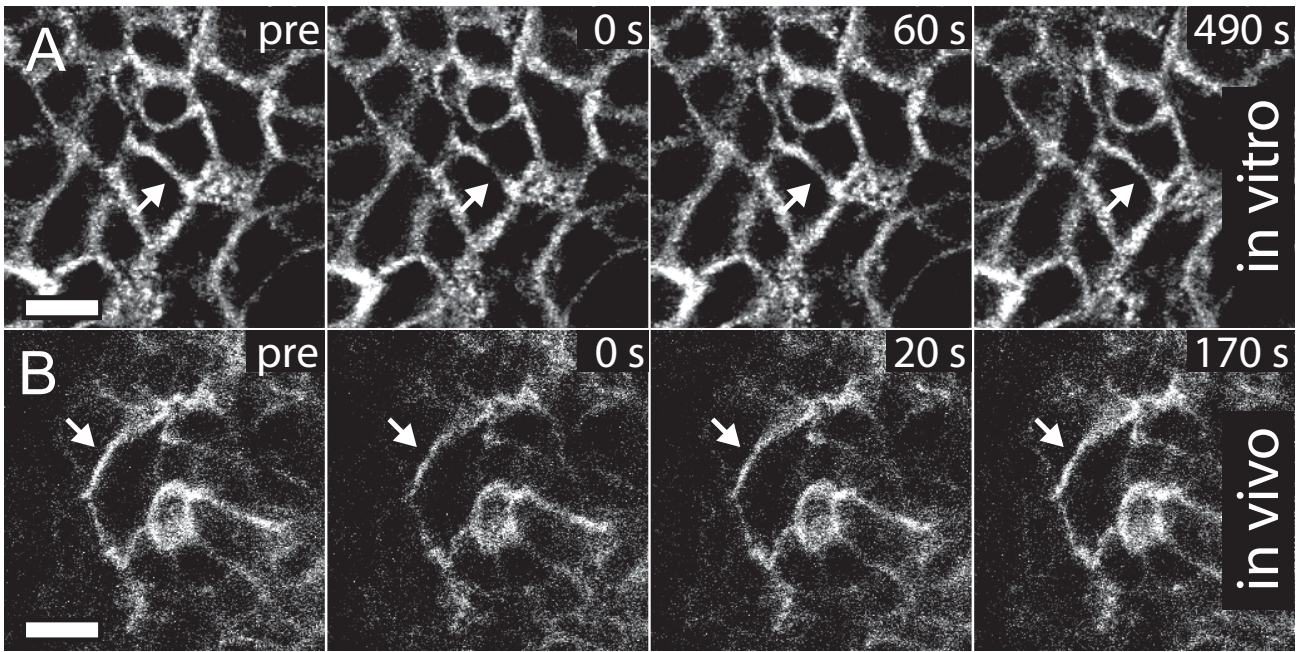

Supplement: 00085472can084308-sup-sfig_1.pdf [file 00085472can084308-sup-sfig_1.pdf]
